# Supplementary material for: Highly Efficient Liquid-Phase Exfoliation of Layered Perovskite-like Titanates HLnTiO4 and H2Ln2Ti3O10 (Ln = La, Nd) into Nanosheets
Source: MDPI journal article supplement (doi:10.3390/nano13233052), 2023-11-29
Supplement: s1 [file s1]

## Supplementary Materials

# Highly Efficient Liquid-Phase Exfoliation of Layered Perovskite-like Titanates $\text{HLnTiO}_4$ and $\text{H}_2\text{Ln}_2\text{Ti}_3\text{O}_{10}$ ( $\text{Ln} = \text{La}, \text{Nd}$ ) into Nanosheets

Sergei A. Kurnosenko, Iana A. Minich, Oleg I. Silyukov \* and Irina A. Zvereva

Department of Chemical Thermodynamics and Kinetics, Institute of Chemistry, Saint Petersburg State University, 199034 Saint Petersburg, Russia; st040572@student.spbu.ru (S.A.K.); yana.minich@spbu.ru (I.A.M.); irina.zvereva@spbu.ru (I.A.Z.)

\* Correspondence: oleg.silyukov@spbu.ru

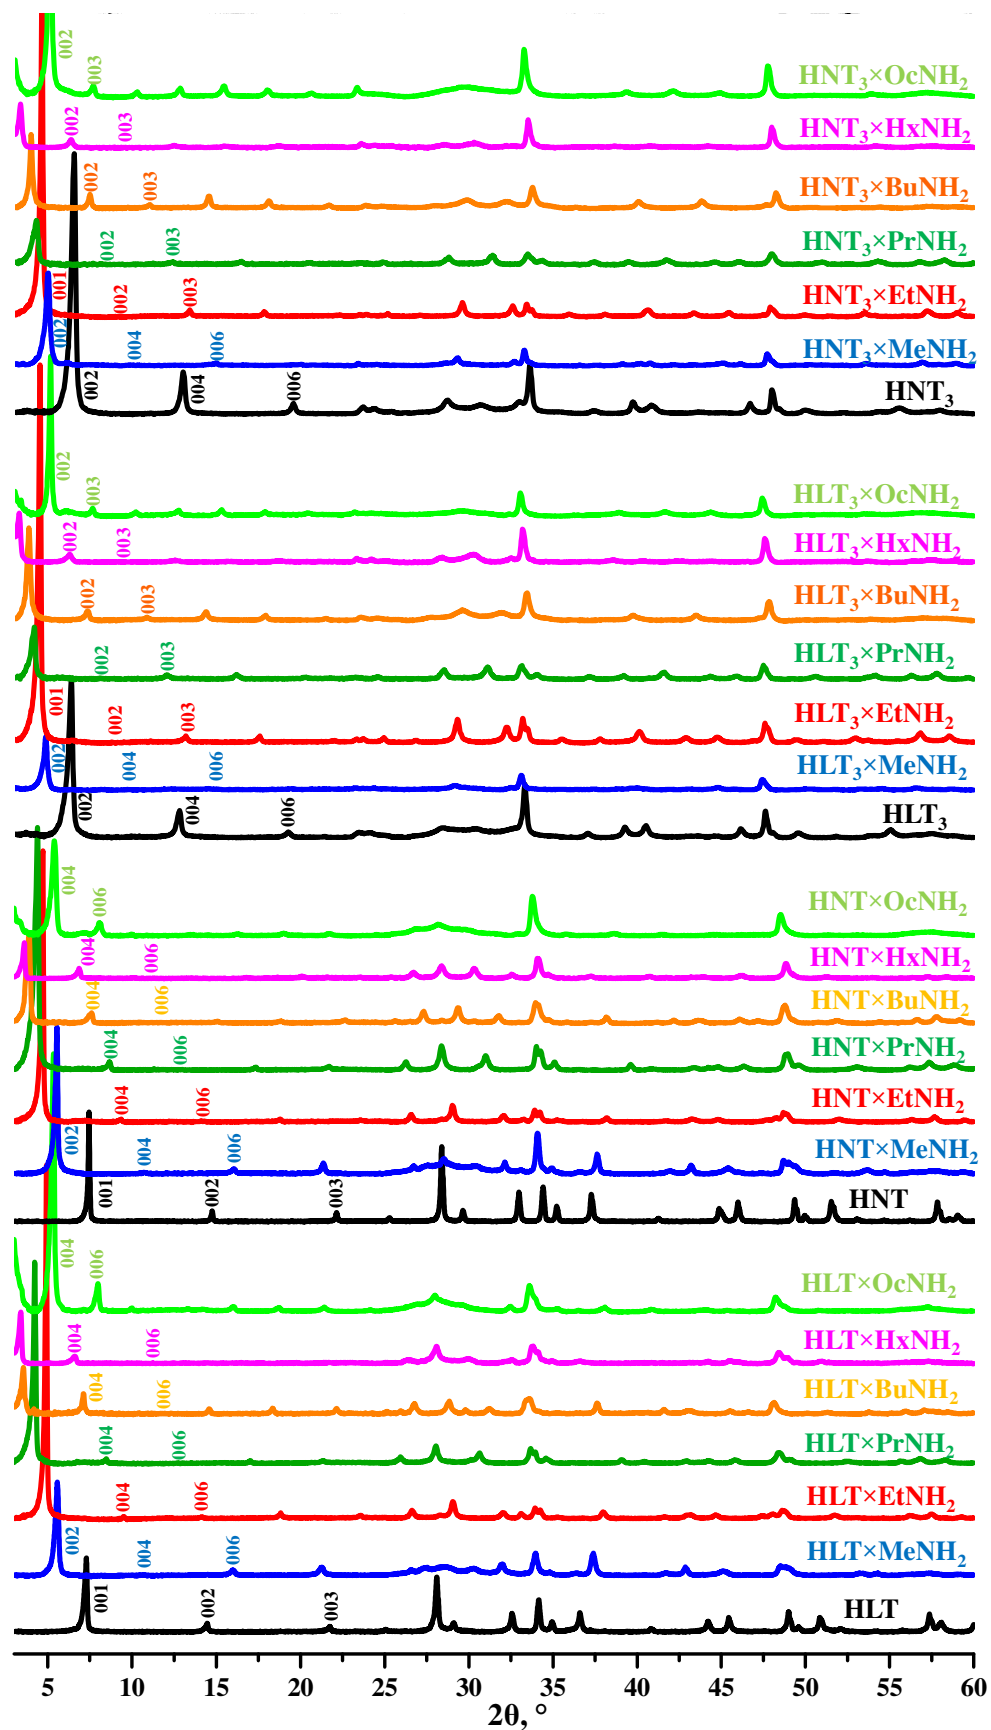

**Figure S1.** Powder XRD patterns of the protonated titanates and their *n*-alkylamine derivatives.

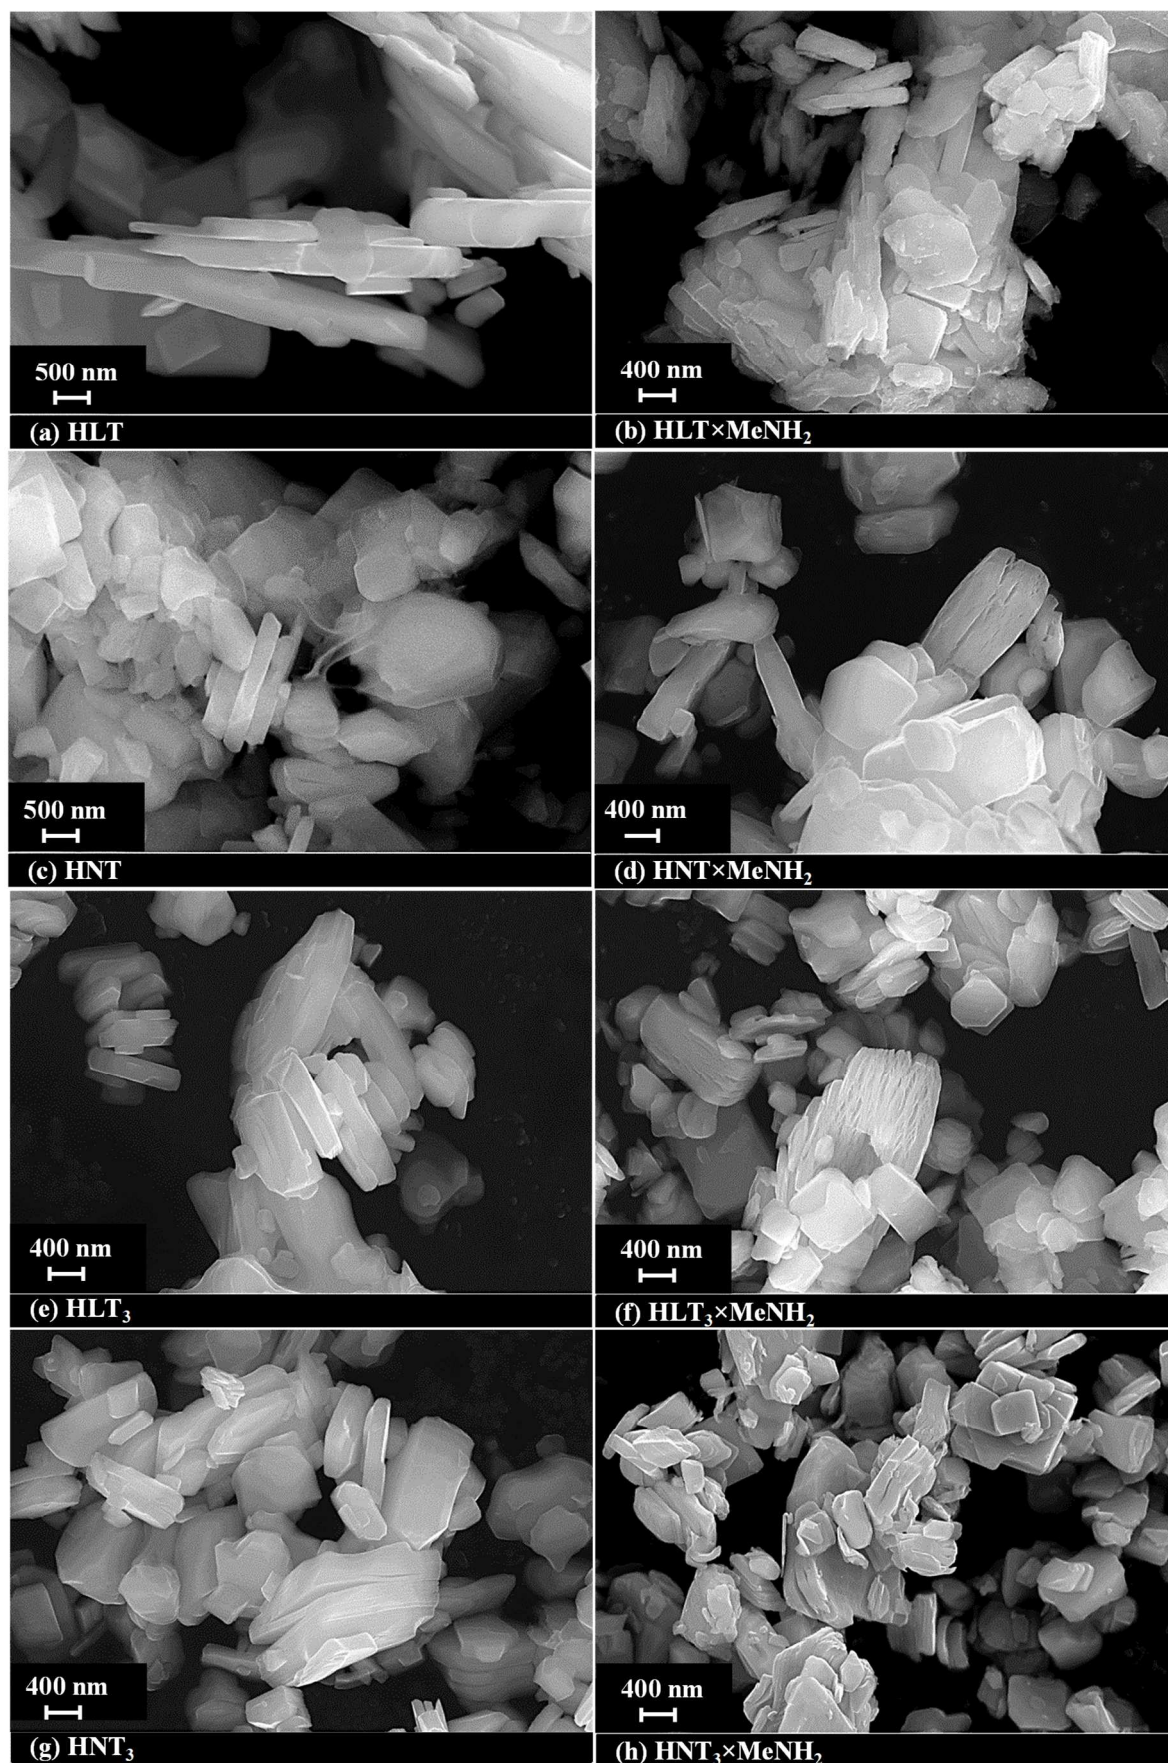

**Figure S2.** SEM images of the protonated and methylamine-intercalated titanates: HLT (a, b), HNT (c, d),  $\text{HLT}_3$  (e, f) and  $\text{HNT}_3$  (g, h).

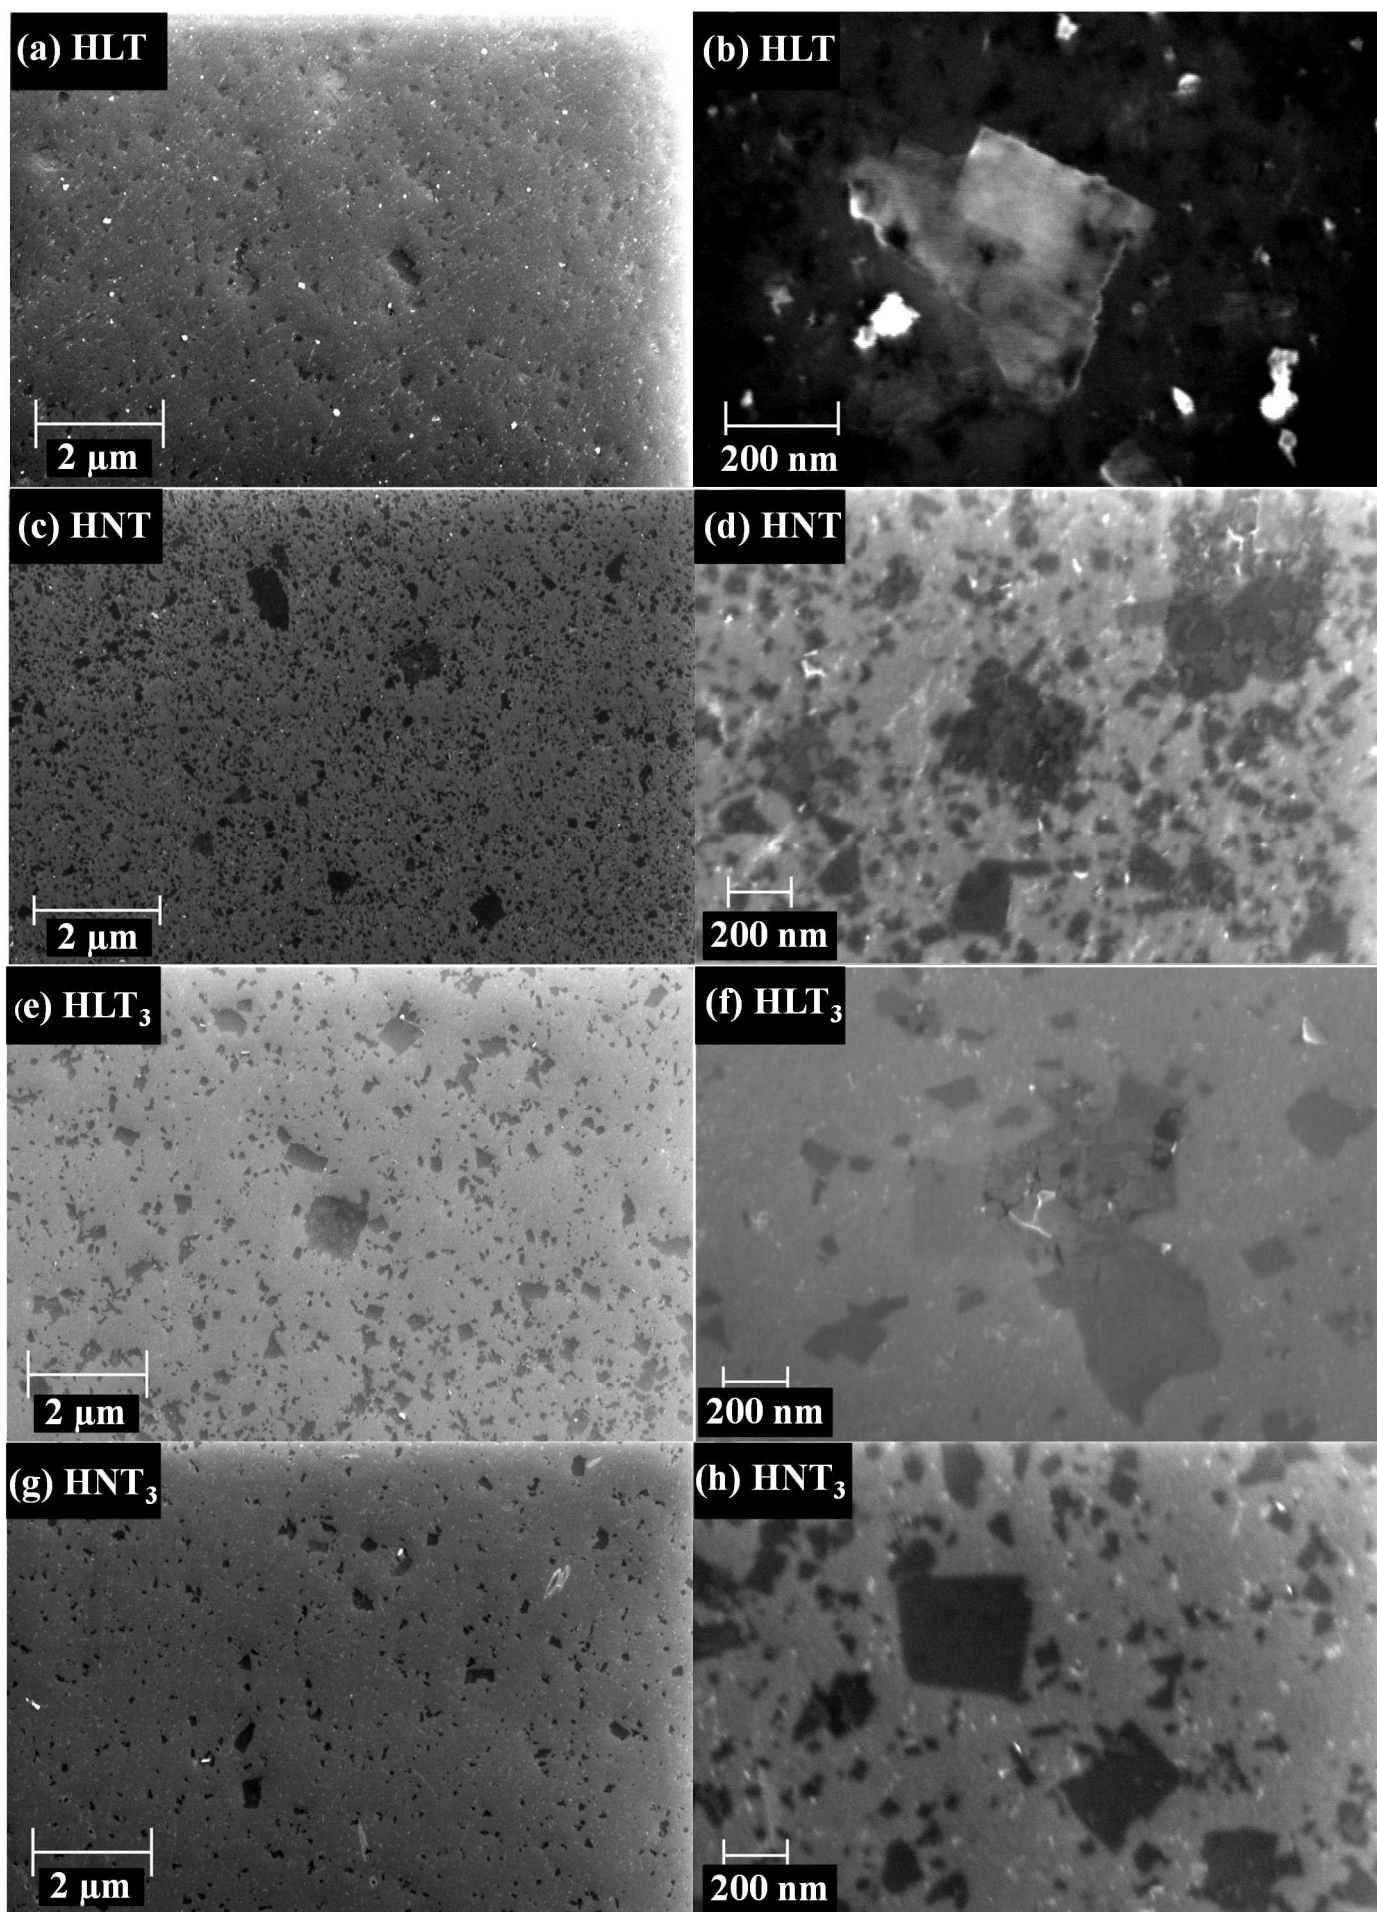

**Figure S3.** SEM images of HLT (a, b), HNT (c, d),  $\text{HLT}_3$  (e, f) and  $\text{HNT}_3$  (g, h) nanosheets on silicon substrates.



**Table S1. Structure parameters and composition of initial compounds.** Tetragonal lattice parameters, interlayer distances  $d$  as well as organic (x) and water (y) content per formula unit of the precursors for exfoliation. Compositions of the  $n$ -alkylamine derivatives are presented as  $\text{HLnTiO}_4 \cdot x\text{RNH}_2 \cdot y\text{H}_2\text{O}$  and  $\text{H}_2\text{Ln}_2\text{Ti}_3\text{O}_{10} \cdot x\text{RNH}_2 \cdot y\text{H}_2\text{O}$ .

| Sample             | $a=b$ , Å | $c$ , Å | $d$ , Å | x    | y    | Sample             | $a=b$ , Å | $c$ , Å | $d$ , Å | x    | y    |
|--------------------|-----------|---------|---------|------|------|--------------------|-----------|---------|---------|------|------|
| HLT                | 3.71      | 12.2    | 12.2    | –    | 0.05 | HLT <sub>3</sub>   | 3.79      | 27.2    | 13.6    | –    | 0.15 |
| xMeNH <sub>2</sub> | 3.77      | 33.3    | 16.7    | 0.35 | 0.45 | xMeNH <sub>2</sub> | 3.83      | 36.7    | 18.4    | 0.70 | 0.30 |
| xEtNH <sub>2</sub> | 3.75      | 37.7    | 18.9    | 0.35 | 0.50 | xEtNH <sub>2</sub> | 3.82      | 20.2    | 20.2    | 0.70 | 0.35 |
| xPrNH <sub>2</sub> | 3.76      | 41.2    | 20.6    | 0.35 | 0.30 | xPrNH <sub>2</sub> | 3.82      | 21.7    | 21.7    | 0.65 | 0.20 |
| xBuNH <sub>2</sub> | 3.76      | 47.8    | 23.9    | 0.40 | 0.25 | xBuNH <sub>2</sub> | 3.81      | 24.7    | 24.7    | 0.70 | 0.35 |
| xHxNH <sub>2</sub> | 3.76      | 54.9    | 27.5    | 0.35 | 0.45 | xHxNH <sub>2</sub> | 3.87      | 29.4    | 29.4    | 0.80 | 0.10 |
| xOcNH <sub>2</sub> | 3.78      | 66.3    | 33.2    | 0.45 | 0.40 | xOcNH <sub>2</sub> | 3.85      | 34.2    | 34.2    | 0.80 | 0.10 |
| HNT                | 3.68      | 12.1    | 12.1    | –    | 0.10 | HNT <sub>3</sub>   | 3.78      | 27.2    | 13.6    | –    | 0.15 |
| xMeNH <sub>2</sub> | 3.74      | 33.1    | 16.6    | 0.35 | 0.40 | xMeNH <sub>2</sub> | 3.81      | 35.4    | 17.7    | 0.70 | 0.30 |
| xEtNH <sub>2</sub> | 3.74      | 37.6    | 18.8    | 0.45 | 0.20 | xEtNH <sub>2</sub> | 3.80      | 19.9    | 19.9    | 0.70 | 0.35 |
| xPrNH <sub>2</sub> | 3.74      | 40.4    | 20.2    | 0.45 | 0.40 | xPrNH <sub>2</sub> | 3.78      | 21.5    | 21.5    | 0.70 | 0.20 |
| xBuNH <sub>2</sub> | 3.74      | 47.7    | 23.9    | 0.45 | 0.30 | xBuNH <sub>2</sub> | 3.78      | 24.4    | 24.4    | 0.75 | 0.35 |
| xHxNH <sub>2</sub> | 3.72      | 54.0    | 27.0    | 0.45 | 0.35 | xHxNH <sub>2</sub> | 3.80      | 29.2    | 29.2    | 0.90 | 0.10 |
| xOcNH <sub>2</sub> | 3.81      | 65.4    | 32.7    | 0.45 | 0.40 | xOcNH <sub>2</sub> | 3.80      | 33.4    | 33.4    | 0.85 | 0.15 |

**Table S2. Nanosheet concentrations and exfoliation yields achieved under various conditions.**

Designations: m – precursor weight, P – sonication power,  $t_1$  – single sonication duration,  $t_2$  – stirring duration, F – separation factor, c – nanosheet concentration,  $\eta$  – nanosheet yield.

| Variable parameter                   | Precursor          | m, mg | TBAOH, M | Sonication |                      | t <sub>2</sub> , d | F    | HLT     |      | HNT     |      | HLT <sub>3</sub> |      | HNT <sub>3</sub> |      |
|--------------------------------------|--------------------|-------|----------|------------|----------------------|--------------------|------|---------|------|---------|------|------------------|------|------------------|------|
|                                      |                    |       |          | P, %       | t <sub>1</sub> , min |                    |      | c, mg/L | η, % | c, mg/L | η, % | c, mg/L          | η, % | c, mg/L          | η, % |
|                                      |                    |       |          |            |                      |                    |      |         |      |         |      |                  |      |                  |      |
| Physical exfoliation                 |                    |       |          |            |                      |                    |      |         |      |         |      |                  |      |                  |      |
| –                                    | Protonated         | 30    | 0        | 100        | 5                    | 1                  | 1000 | 1.5     | 0.15 | 1.7     | 0.17 | 1.6              | 0.16 | 1.8              | 0.18 |
|                                      | ×MeNH <sub>2</sub> |       |          |            |                      |                    |      | 3.7     | 0.37 | 6.3     | 0.63 | 3.8              | 0.38 | 6.1              | 0.61 |
| Chemical exfoliation                 |                    |       |          |            |                      |                    |      |         |      |         |      |                  |      |                  |      |
| –                                    | Protonated         | 30    | 0.004    | –          | –                    | 1                  | 1000 | 2.3     | 0.23 | 2.7     | 0.27 | 2.4              | 0.24 | 2.6              | 0.26 |
|                                      | ×MeNH <sub>2</sub> |       |          |            |                      |                    |      | 5.0     | 0.50 | 17      | 1.7  | 10               | 1.0  | 13               | 1.3  |
| Physical-chemical exfoliation        |                    |       |          |            |                      |                    |      |         |      |         |      |                  |      |                  |      |
| Chain length of <i>n</i> -alkylamine | Protonated         | 30    | 0.004    | 50         | 5                    | 1                  | 1000 | 4.1     | 0.41 | 4.7     | 0.47 | 2.6              | 0.26 | 3.2              | 0.32 |
|                                      | ×MeNH <sub>2</sub> |       |          |            |                      |                    |      | 46      | 4.6  | 530     | 54   | 100              | 10   | 330              | 33   |
|                                      | ×EtNH <sub>2</sub> |       |          |            |                      |                    |      | 50      | 5.0  | 750     | 75   | 170              | 17   | 460              | 46   |
|                                      | ×PrNH <sub>2</sub> |       |          |            |                      |                    |      | 48      | 4.8  | 510     | 51   | 140              | 14   | 79               | 7.9  |
|                                      | ×BuNH <sub>2</sub> |       |          |            |                      |                    |      | 13      | 1.3  | 6.5     | 0.65 | 4.5              | 0.45 | 8.6              | 0.86 |
|                                      | ×HxNH <sub>2</sub> |       |          |            |                      |                    |      | 11      | 1.1  | 5.3     | 0.53 | 4.1              | 0.41 | 5.4              | 0.54 |
|                                      | ×OcNH <sub>2</sub> |       |          |            |                      |                    |      | 3.6     | 0.36 | 4.9     | 0.49 | 3.7              | 0.37 | 4.0              | 0.40 |
| Precursor weight                     | ×EtNH <sub>2</sub> | 90    | 0.012    | 50         | 5                    | 1                  | 1000 | 115     | 3.8  | 1500    | 50   | 340              | 11   | 960              | 32   |
|                                      |                    | 150   | 0.02     |            |                      |                    |      | 160     | 3.2  | 2100    | 42   | 480              | 9.6  | 1200             | 24   |
| TBAOH concentration                  | ×EtNH <sub>2</sub> | 30    | 0.002    | 50         | 5                    | 1                  | 1000 | 21      | 2.1  | 290     | 29   | 85               | 8.5  | 260              | 26   |
|                                      |                    |       | 0.008    |            |                      |                    |      | 35      | 3.5  | 610     | 61   | 150              | 15   | 390              | 39   |
| Sonication power                     | ×EtNH <sub>2</sub> | 30    | 0.004    | 25         | 5                    | 1                  | 1000 | 27      | 2.7  | 390     | 39   | 99               | 9.9  | 270              | 27   |
|                                      |                    |       |          | 100        |                      |                    |      | 52      | 5.2  | 740     | 74   | 180              | 18   | 450              | 45   |
| Sonication duration                  | ×EtNH <sub>2</sub> | 30    | 0.004    | 50         | 1                    | 1                  | 1000 | 39      | 3.9  | 620     | 62   | 140              | 14   | 390              | 39   |
|                                      |                    |       |          |            | 10                   |                    |      | 53      | 5.3  | 770     | 77   | 180              | 18   | 480              | 48   |
| Stirring duration                    | ×EtNH <sub>2</sub> | 30    | 0.004    | 50         | 5                    | 7                  | 1000 | 250     | 25   | 930     | 93   | 740              | 74   | 890              | 89   |
|                                      |                    |       |          |            |                      | 21                 |      | 270     | 27   | 950     | 95   | 810              | 81   | 920              | 92   |
| Separation factor                    | ×EtNH <sub>2</sub> | 30    | 0.004    | 50         | 5                    | 1                  | 100  | 230     | 23   | 850     | 85   | 700              | 70   | 910              | 91   |
|                                      |                    |       |          |            |                      |                    | 500  | 95      | 9.5  | 770     | 77   | 310              | 31   | 720              | 72   |
